# Supplementary material
Source: Research Square preprint supplement (doi:10.21203/rs.3.rs-10089073/v1)
Supplement: Supplementary file 1 [file be3b77d4542ee294c4e1baf4.pdf]

# Supplementary Information

## ECG-LLM Foundation Model for ECG-Based Cardiac Reasoning

### Supplementary Information

#### 1 Dataset statistics

Table 1 shows the number of ECG recordings and patients in each dataset split. Table 2 summarizes the final ECG-LLM instruction-tuning corpus.

| Split      | Entity      | UK Biobank | MIMIC-IV-ECG | PTB-XL | EchoNext | All     |
|------------|-------------|------------|--------------|--------|----------|---------|
| Train      | ECG studies | 34,280     | 560,791      | 11,566 | 72,475   | 679,112 |
| Train      | Patients    | 34,280     | 115,508      | 10,403 | 26,218   | 186,409 |
| Validation | ECG studies | –          | 62,251       | 1,274  | 4,626    | 68,151  |
| Validation | Patients    | –          | 12,834       | 1,155  | 4,626    | 18,615  |
| Test       | ECG studies | 6,049      | 156,851      | 3,214  | 5,442    | 171,556 |
| Test       | Patients    | 6,049      | 32,086       | 2,891  | 5,442    | 46,468  |

Table 1: Dataset split statistics. The table reports the number of ECG studies and unique patients in the training, validation, and test splits for each ECG cohort. UK Biobank was split subject-wise into training and test sets only.

| Dataset      | QA source            | Type                           | # Samples        |
|--------------|----------------------|--------------------------------|------------------|
| UK Biobank   | Structured-record QA | ECG and CMR, standard          | 670,545          |
|              | Structured-record QA | ECG and CMR, abnormal-enriched | 173,238          |
|              | Structured-record QA | ECG and CMR, chain-of-thought  | 167,701          |
| EchoNext     | Structured-record QA | ECG and echo, standard         | 546,156          |
|              | Structured-record QA | ECG and echo, chain-of-thought | 129,625          |
| MIMIC-IV-ECG | Structured-record QA | ECG interpretation, standard   | 2,775,751        |
|              | ECG-QA               | Single-Verify                  | 125,380          |
|              | ECG-QA               | Single-Choose                  | 107,860          |
|              | ECG-QA               | Single-Query                   | 153,156          |
|              | ECGInstruct          | Feature (Close/Open)           | 3,865            |
|              | ECGInstruct          | Rhythm (Close/Open)            | 38,124           |
|              | ECGInstruct          | Morphology (Close/Open)        | 62,663           |
|              | ECGInstruct          | Report (Open)                  | 345,561          |
| PTB-XL       | Structured-record QA | ECG interpretation, standard   | 127,219          |
|              | ECG-QA               | Single-Verify                  | 62,554           |
|              | ECG-QA               | Single-Choose                  | 50,015           |
|              | ECG-QA               | Single-Query                   | 46,737           |
|              | ECGInstruct          | Feature (Close/Open)           | 57,108           |
|              | ECGInstruct          | Rhythm (Close/Open)            | 18,899           |
|              | ECGInstruct          | Morphology (Close/Open)        | 108,379          |
|              | ECGInstruct          | Report (Open)                  | 7,890            |
| <b>Total</b> |                      |                                | <b>5,778,426</b> |

Table 2: Final ECG-LLM instruction-tuning corpus. Structured-record QA denotes generated examples produced from the per-study cardiac records created in this work.

## 2 UK Biobank ECG and CMR phenotype question bank

| Question group                                        | ECG-LLM questions                                                                                                                                                    | Target phenotypes                                                                         |
|-------------------------------------------------------|----------------------------------------------------------------------------------------------------------------------------------------------------------------------|-------------------------------------------------------------------------------------------|
| Heart rate and rhythm                                 | What does the ECG reveal about the patient’s heart rate and rhythm?<br>Review the ECG and describe the rhythm and rate.                                              | ECG heart rate [bpm]; RR interval [ms].                                                   |
| P-wave characteristics and atrioventricular intervals | Review this ECG and describe atrial activity and AV conduction.<br>Review the ECG and infer the P-wave characteristics and atrioventricular intervals.               | P duration [ms]; PP interval [ms]; PQ interval [ms].                                      |
| QRS duration and ventricular conduction               | Is the QRS duration within normal limits?<br>Review the ECG and identify any conduction delays.                                                                      | QRS duration [ms].                                                                        |
| QT interval and ventricular repolarization            | Are there any repolarization abnormalities on this ECG?<br>Is the QT interval within normal limits?                                                                  | QT interval [ms]; QTC interval [ms].                                                      |
| Electrical axes                                       | Are the electrical axes within normal limits?<br>Does the ECG show any axis deviation?                                                                               | P axis [degrees]; R axis [degrees]; T axis [degrees].                                     |
| Left ventricular systolic function                    | Review the ECG and describe LV ejection fraction.<br>What does this ECG reveal about left ventricular systolic function?                                             | LV ejection fraction.                                                                     |
| Left ventricular stroke volume                        | Review the ECG and describe LV stroke volume.<br>What does this ECG reveal about left ventricular stroke volume?                                                     | LV stroke volume.                                                                         |
| Left ventricular volumes                              | Review the ECG and describe any abnormalities found for LV.<br>What does this ECG reveal about left ventricular volumes?                                             | LV end diastolic volume; LV end systolic volume.                                          |
| Left ventricular myocardial mass and wall thickness   | Is there any evidence of ventricular hypertrophy or increased myocardial mass?<br>What does this ECG reveal about left ventricular wall thickness?                   | LV myocardial mass; LV mean myocardial wall thickness global.                             |
| Left ventricular strain                               | Do the strain measurements suggest any myocardial dysfunction?<br>Review this ECG and describe any abnormalities in left ventricular strain.                         | LV circumferential strain global; LV longitudinal strain global; LV radial strain global. |
| Cardiac output and cardiac index                      | What does this ECG indicate about cardiac output and cardiac index?<br>Examine this ECG and tell if the cardiac output or index within normal limits?                | LV cardiac output; cardiac index [litres/min/m2].                                         |
| Right ventricular stroke volume                       | Review this ECG and describe RV stroke volume.<br>What does this ECG reveal about right ventricular stroke volume?                                                   | RV stroke volume.                                                                         |
| Right ventricular ejection fraction                   | Review this ECG and describe RV ejection fraction.<br>What does this ECG reveal about right ventricular systolic function?                                           | RV ejection fraction.                                                                     |
| Right ventricular volumes and function                | Review this ECG and describe all abnormalities for RV.<br>Review the ECG and indicate about abnormalities in right ventricular volumes.                              | RV end diastolic volume; RV end systolic volume.                                          |
| Left atrial volumes and function                      | What does this ECG suggest about left atrial volumes and function?<br>Examine this ECG and tell if there is any evidence of left atrial enlargement or dysfunction?  | LA maximum volume; LA minimum volume; LA stroke volume; LA ejection fraction.             |
| Right atrial volumes and function                     | What does this ECG reveal about right atrial volumes and function?<br>Examine this ECG and tell if there is any evidence of right atrial enlargement or dysfunction? | RA maximum volume; RA minimum volume; RA stroke volume; RA ejection fraction.             |
| Aortic distensibility                                 | Review this ECG and state whether there is any indirect evidence that could suggest abnormal aortic or vascular stiffness.                                           | Ascending aorta distensibility; Descending aorta distensibility.                          |

Table 3: UK Biobank question bank used for ECG-derived and CMR-derived phenotype elicitation from ECG alone.

### 3 UK Biobank phenotype extraction protocol

Because ECG-LLM was trained to generate free-text answers, the UK Biobank phenotype evaluation required an additional mapping step from generated text to the predefined phenotype-category schema. We used the Google LangExtract framework [1, 2] to apply a schema-constrained extraction prompt to ECG-LLM answers. LangExtract is a Python library for extracting structured information from unstructured text using LLMs and user-defined extraction instructions. In our setup, the backend model was a locally deployed GPT-OSS-20B instance [3, 4, 5].

For each ECG and question group, the extractor received the generated answer, the target phenotype fields assigned to that question group, and the allowed category labels for each target phenotype. It was instructed to return allowed category labels only for those target fields found in the ECG-LLM answers. This group-specific extraction kept the evaluation aligned with the clinical intent of the question: the model was neither rewarded nor penalized for mentioning unrelated phenotypes outside the asked group. This step was necessary because a free-text answer could describe several related phenotypes together, refer to multiple measurements collectively, or express a category without repeating the exact phenotype name used in the evaluation schema. Therefore, simple string matching or regular expressions would not reliably map answers to field-specific category labels. The extractor served only as a mapping layer from free text to the predefined category space used for evaluation.

#### Prompt for schema-constrained phenotype extraction

```
Extract discrete cardiac phenotype categories.
Use only the phenotype field names listed below as possible extraction classes.
Use the allowed category words as the extraction text.
Do not extract numeric values or explanations.
If the answer says several named phenotypes are normal, extract normal for each named
↪ phenotype.
Sometimes, phenotype fields may not contain dimension information in square brackets, this is
↪ still valid.
If the answer says one phenotype is abnormal but does not give a discrete allowed category,
↪ do not extract it.
ALLOWED PHENOTYPES AND CATEGORIES:
- <phenotype field 1>: <allowed category 1>, <allowed category 2>, ...
- <phenotype field 2>: <allowed category 1>, <allowed category 2>, ...
- ...
```

## 4 UK Biobank phenotype extraction results

| Field                                      | $n$  | $K$ | Cov.  | Miss. | Acc.  | BAcc. | wF1   | Maj.  | mF1   |
|--------------------------------------------|------|-----|-------|-------|-------|-------|-------|-------|-------|
| <i>ECG measurements</i>                    |      |     |       |       |       |       |       |       |       |
| ECG heart rate [bpm]                       | 1000 | 5   | 1.000 | 0.000 | 0.958 | 0.974 | 0.958 | 0.126 | 0.977 |
| R axis [degrees]                           | 1000 | 3   | 1.000 | 0.000 | 0.987 | 0.919 | 0.987 | 0.315 | 0.940 |
| RR interval [ms]                           | 1000 | 5   | 1.000 | 0.000 | 0.944 | 0.969 | 0.944 | 0.127 | 0.926 |
| P duration [ms]                            | 979  | 2   | 1.000 | 0.000 | 0.974 | 0.824 | 0.972 | 0.481 | 0.886 |
| QRS duration [ms]                          | 1000 | 3   | 0.987 | 0.013 | 0.976 | 0.886 | 0.976 | 0.320 | 0.874 |
| T axis [degrees]                           | 1000 | 4   | 1.000 | 0.000 | 0.888 | 0.681 | 0.880 | 0.212 | 0.726 |
| QTC interval [ms]                          | 1000 | 3   | 1.000 | 0.000 | 0.962 | 0.652 | 0.958 | 0.324 | 0.719 |
| PP interval [ms]                           | 999  | 5   | 1.000 | 0.000 | 0.930 | 0.605 | 0.927 | 0.126 | 0.637 |
| P axis [degrees]                           | 938  | 3   | 1.000 | 0.000 | 0.908 | 0.540 | 0.888 | 0.310 | 0.614 |
| PQ interval [ms]                           | 980  | 3   | 1.000 | 0.000 | 0.906 | 0.458 | 0.879 | 0.313 | 0.522 |
| <i>CMR-derived phenotypes</i>              |      |     |       |       |       |       |       |       |       |
| LV mean myocardial wall thickness global   | 990  | 2   | 1.000 | 0.000 | 0.965 | 0.974 | 0.966 | 0.445 | 0.947 |
| RV end diastolic volume                    | 1000 | 3   | 0.999 | 0.001 | 0.993 | 0.708 | 0.991 | 0.327 | 0.708 |
| LV radial strain global                    | 833  | 3   | 0.975 | 0.025 | 0.998 | 0.667 | 0.996 | 0.311 | 0.666 |
| RV end systolic volume                     | 1000 | 3   | 0.999 | 0.001 | 0.995 | 0.667 | 0.993 | 0.327 | 0.641 |
| RA minimum volume                          | 988  | 3   | 1.000 | 0.000 | 0.910 | 0.594 | 0.885 | 0.314 | 0.592 |
| RA maximum volume                          | 989  | 3   | 0.999 | 0.001 | 0.906 | 0.569 | 0.894 | 0.312 | 0.560 |
| LA maximum volume                          | 989  | 3   | 0.999 | 0.001 | 0.950 | 0.473 | 0.937 | 0.322 | 0.547 |
| LV end systolic volume                     | 998  | 3   | 1.000 | 0.000 | 0.943 | 0.460 | 0.930 | 0.318 | 0.507 |
| LV myocardial mass                         | 1000 | 2   | 0.977 | 0.023 | 0.950 | 0.495 | 0.934 | 0.488 | 0.487 |
| Ascending aorta distensibility             | 872  | 2   | 0.814 | 0.186 | 0.866 | 0.484 | 0.891 | 0.489 | 0.486 |
| RV ejection fraction                       | 999  | 5   | 1.000 | 0.000 | 0.981 | 0.443 | 0.974 | 0.197 | 0.469 |
| LA minimum volume                          | 988  | 3   | 1.000 | 0.000 | 0.881 | 0.429 | 0.850 | 0.305 | 0.459 |
| RV stroke volume                           | 999  | 3   | 1.000 | 0.000 | 0.961 | 0.472 | 0.955 | 0.327 | 0.458 |
| RA stroke volume                           | 989  | 3   | 0.999 | 0.001 | 0.884 | 0.403 | 0.866 | 0.314 | 0.416 |
| LV end diastolic volume                    | 1000 | 3   | 0.998 | 0.002 | 0.945 | 0.383 | 0.925 | 0.322 | 0.410 |
| Cardiac index [litres/min/m <sup>2</sup> ] | 843  | 5   | 1.000 | 0.000 | 0.696 | 0.396 | 0.672 | 0.114 | 0.397 |
| LA ejection fraction                       | 989  | 3   | 0.999 | 0.001 | 0.908 | 0.369 | 0.868 | 0.316 | 0.381 |
| LV ejection fraction                       | 1000 | 5   | 1.000 | 0.000 | 0.946 | 0.321 | 0.934 | 0.191 | 0.371 |
| LV stroke volume                           | 1000 | 3   | 1.000 | 0.000 | 0.941 | 0.360 | 0.917 | 0.323 | 0.371 |
| RA ejection fraction                       | 989  | 3   | 0.999 | 0.001 | 0.876 | 0.361 | 0.831 | 0.310 | 0.363 |
| LV longitudinal strain global              | 815  | 3   | 0.996 | 0.004 | 0.966 | 0.346 | 0.950 | 0.327 | 0.352 |
| Descending aorta distensibility            | 872  | 3   | 0.810 | 0.190 | 0.857 | 0.358 | 0.887 | 0.326 | 0.339 |
| LA stroke volume                           | 989  | 3   | 0.999 | 0.001 | 0.956 | 0.333 | 0.935 | 0.326 | 0.326 |
| LV circumferential strain global           | 833  | 3   | 0.975 | 0.025 | 0.950 | 0.333 | 0.925 | 0.324 | 0.325 |
| LV cardiac output                          | 1000 | 5   | 0.843 | 0.157 | 0.766 | 0.271 | 0.695 | 0.170 | 0.277 |

Table 4: Full UK Biobank phenotype extraction results for ECG-derived and CMR-derived fields. The table reports field-level sample size ( $n$ ), number of possible classification classes ( $K$ ), coverage, missing rate, accuracy, balanced accuracy, weighted-F1, majority-class macro-F1, and macro-F1. Fields are ordered by macro-F1 within each group.

## 5 EchoNext ECG-only binary phenotype questions

| Phenotype                              | ECG-LLM question                                                                                                                                                                   |
|----------------------------------------|------------------------------------------------------------------------------------------------------------------------------------------------------------------------------------|
| LVEF $\leq$ 45%                        | Does this ECG suggest moderately or severely reduced left ventricular systolic function?                                                                                           |
| LVWT $\geq$ 1.3 cm                     | Does this ECG show moderate left ventricular hypertrophy with the maximum of the interventricular septum (IVS) or posterior wall (LVPW) thickness greater than or equal to 1.3 cm? |
| AS $\geq$ moderate                     | Does this ECG show moderate or severe aortic stenosis?                                                                                                                             |
| AR $\geq$ moderate                     | Does this ECG suggest moderate or severe aortic regurgitation?                                                                                                                     |
| MR $\geq$ moderate                     | Does this ECG suggest moderate or severe mitral regurgitation?                                                                                                                     |
| TR $\geq$ moderate                     | Does this ECG suggest moderate or severe tricuspid regurgitation?                                                                                                                  |
| PR $\geq$ moderate                     | Does this ECG suggest moderate or severe pulmonary regurgitation?                                                                                                                  |
| RV systolic dysf. $\geq$ moderate      | Does this ECG suggest moderate or severe right ventricular systolic dysfunction?                                                                                                   |
| Pericardial eff. $\geq$ moderate/large | Does this ECG suggest a moderate or large pericardial effusion?                                                                                                                    |
| PASP $\geq$ 45 mmHg                    | Does this ECG suggest pulmonary hypertension, as would be expected with a pulmonary artery systolic pressure of at least 45 mmHg?                                                  |
| TR Vmax $\geq$ 3.2 m/s                 | Does this ECG suggest a tricuspid regurgitation jet velocity of at least 3.2 m/s?                                                                                                  |

Table 5: EchoNext phenotype-specific questions used for ECG-only yes/no question answering. For each ECG and phenotype, ECG-LLM first answered the initial question in free text. In the same conversation, the model was then asked: “Give the final answer to the original question as yes or no.” The final yes/no response was parsed and compared with the corresponding echocardiographic binary label.

## 6 PTB-XL ECG-QA performance by question format and attribute

| Question format | Attribute type      | $n$   | EM    | $\mu\mathbf{P}$ | $\mu\mathbf{R}$ | $\mu\mathbf{F1}$ |
|-----------------|---------------------|-------|-------|-----------------|-----------------|------------------|
| Single-Verify   | SCP code            | 8,243 | 79.52 | 79.52           | 79.52           | 79.52            |
| Single-Verify   | Heart axis          | 237   | 89.87 | 89.87           | 89.87           | 89.87            |
| Single-Verify   | Stage of infarction | 168   | 82.74 | 82.74           | 82.74           | 82.74            |
| Single-Verify   | Noise               | 3,183 | 67.73 | 67.73           | 67.73           | 67.73            |
| Single-Verify   | Extra systole       | 230   | 77.39 | 77.39           | 77.39           | 77.39            |
| Single-Verify   | Numeric feature     | 1,020 | 77.84 | 77.84           | 77.84           | 77.84            |
| Single-Choose   | SCP code            | 9,358 | 69.30 | 77.50           | 72.95           | 75.16            |
| Single-Choose   | Heart axis          | 36    | 75.00 | 75.00           | 75.00           | 75.00            |
| Single-Choose   | Stage of infarction | 18    | 55.56 | 55.56           | 55.56           | 55.56            |
| Single-Choose   | Noise               | 317   | 43.22 | 55.21           | 46.27           | 50.35            |
| Single-Choose   | Extra systole       | 22    | 50.00 | 54.55           | 46.15           | 50.00            |
| Single-Choose   | Numeric feature     | 104   | 60.58 | 60.58           | 60.58           | 60.58            |
| Single-Query    | SCP code            | 9,208 | 43.07 | 59.47           | 57.99           | 58.72            |
| Single-Query    | Heart axis          | 167   | 74.85 | 74.85           | 74.85           | 74.85            |
| Single-Query    | Stage of infarction | 178   | 46.07 | 46.07           | 46.07           | 46.07            |
| Single-Query    | Noise               | 3,960 | 38.86 | 44.48           | 46.04           | 45.24            |
| Single-Query    | Extra systole       | 241   | 54.77 | 56.85           | 55.02           | 55.92            |
| Single-Query    | Numeric feature     | 4,403 | 25.03 | 65.75           | 65.96           | 65.85            |

Table 6: PTB-XL ECG-QA performance stratified by question format and ECG-QA attribute type. Question format is the single-ECG ECG-QA format evaluated in this work. Attribute type is the broad ECG-QA metadata category used to generate the question.  $n$  is the number of evaluated question instances in the corresponding question-format and attribute-type subset. EM is exact-match accuracy over the complete predicted answer set.  $\mu\mathbf{P}$ ,  $\mu\mathbf{R}$ , and  $\mu\mathbf{F1}$  are micro-averaged option-level precision, recall, and F1.

## 7 MIMIC-IV-ECG ECG-QA performance by question format and attribute

| Question format | Attribute type      | $n$    | EM    | $\mu\mathbf{P}$ | $\mu\mathbf{R}$ | $\mu\mathbf{F1}$ |
|-----------------|---------------------|--------|-------|-----------------|-----------------|------------------|
| Single-Verify   | SCP code            | 23,950 | 81.16 | 81.16           | 81.16           | 81.16            |
| Single-Verify   | Heart axis          | 240    | 81.67 | 81.67           | 81.67           | 81.67            |
| Single-Verify   | Stage of infarction | 180    | 78.33 | 78.33           | 78.33           | 78.33            |
| Single-Verify   | Noise               | 148    | 79.05 | 79.05           | 79.05           | 79.05            |
| Single-Verify   | Numeric feature     | 1,020  | 79.22 | 79.22           | 79.22           | 79.22            |
| Single-Choose   | SCP code            | 21,971 | 68.43 | 75.41           | 71.82           | 73.57            |
| Single-Choose   | Heart axis          | 38     | 50.00 | 55.26           | 52.50           | 53.85            |
| Single-Choose   | Stage of infarction | 18     | 77.78 | 77.78           | 77.78           | 77.78            |
| Single-Choose   | Numeric feature     | 104    | 60.58 | 60.58           | 60.58           | 60.58            |
| Single-Query    | SCP code            | 54,167 | 19.25 | 55.34           | 48.35           | 51.61            |
| Single-Query    | Heart axis          | 200    | 64.50 | 64.50           | 64.50           | 64.50            |
| Single-Query    | Stage of infarction | 250    | 44.80 | 44.80           | 44.80           | 44.80            |
| Single-Query    | Noise               | 27     | 7.41  | 12.50           | 12.90           | 12.70            |
| Single-Query    | Numeric feature     | 7,617  | 20.90 | 69.54           | 66.92           | 68.21            |

Table 7: MIMIC-IV-ECG ECG-QA performance stratified by question format and ECG-QA attribute type. The question format is the single-ECG ECG-QA format evaluated in this work. Attribute type is the broad ECG-QA metadata category used to generate the question.  $n$  is the number of evaluated question instances in the corresponding question-format and attribute-type subset. EM is exact-match accuracy over the complete predicted answer set.  $\mu\mathbf{P}$ ,  $\mu\mathbf{R}$ , and  $\mu\mathbf{F1}$  are micro-averaged option-level precision, recall, and F1.

## 8 ECG-QA Single-Verify performance by attribute

Table 8: ECG-QA Single-Verify performance by attribute for PTB-XL and MIMIC-IV-ECG. EM is reported as percent.

| Attribute                                                            | MIMIC    |       | PTB-XL   |       |
|----------------------------------------------------------------------|----------|-------|----------|-------|
|                                                                      | <i>n</i> | EM    | <i>n</i> | EM    |
| <b>SCP-code diagnostic statements</b>                                |          |       |          |       |
| 2:1 AV block                                                         | 60       | 93.3  | -        | -     |
| 2:1 sinoatrial block                                                 | 42       | 92.9  | -        | -     |
| 3:1 AV block                                                         | 60       | 70.0  | -        | -     |
| 4:1 AV block                                                         | 60       | 73.3  | -        | -     |
| aberrant supraventricular complexes                                  | 60       | 75.0  | -        | -     |
| aberrant ventricular complex                                         | 60       | 90.0  | -        | -     |
| abnormal qrs                                                         | -        | -     | 60       | 71.7  |
| abnormal R wave progression                                          | 60       | 83.3  | -        | -     |
| abnormal ventricular conduction pathways                             | 60       | 73.3  | -        | -     |
| accelerated idioventricular rhythm                                   | 60       | 88.3  | -        | -     |
| accelerated junctional rhythm                                        | 80       | 65.0  | -        | -     |
| any diagnostic symptoms                                              | 120      | 75.8  | 120      | 80.8  |
| any form-related symptoms                                            | 60       | 80.0  | 60       | 66.7  |
| any kind of abnormal symptoms                                        | 60       | 81.7  | 60       | 71.7  |
| any rhythm-related symptoms                                          | 60       | 75.0  | 60       | 65.0  |
| atrial arrhythmia                                                    | 12       | 100.0 | -        | -     |
| atrial bigeminy                                                      | 60       | 66.7  | -        | -     |
| atrial couplet                                                       | 60       | 65.0  | -        | -     |
| atrial fibrillation                                                  | 60       | 90.0  | 60       | 86.7  |
| atrial flutter                                                       | 80       | 63.7  | 36       | 94.4  |
| atrial premature complex                                             | -        | -     | 60       | 71.7  |
| atrial tachycardia                                                   | 60       | 91.7  | -        | -     |
| atypical left bundle branch block                                    | 60       | 91.7  | -        | -     |
| atypical right bundle branch block                                   | 60       | 85.0  | -        | -     |
| AV dissociation                                                      | 60       | 76.7  | -        | -     |
| AV sequential pacemaker                                              | 60       | 90.0  | -        | -     |
| bi-atrial overload/enlargement                                       | 80       | 68.8  | -        | -     |
| bigeminal pattern (unknown origin, supraventricular, or ventricular) | -        | -     | 50       | 80.0  |
| Biventricular hypertrophy                                            | 60       | 91.7  | -        | -     |
| Broad R wave in lateral leads                                        | 60       | 86.7  | -        | -     |
| complete left bundle branch block                                    | 60       | 93.3  | 60       | 100.0 |
| complete right bundle branch block                                   | 60       | 98.3  | 61       | 96.7  |
| conduction disturbance                                               | 60       | 71.7  | 60       | 83.3  |
| Deep S wave                                                          | 581      | 91.7  | -        | -     |
| dextrocardia                                                         | 56       | 78.6  | -        | -     |
| digitalis effect                                                     | -        | -     | 67       | 76.1  |
| dual chamber electronic pacing                                       | 60       | 98.3  | -        | -     |
| early R wave transition                                              | 60       | 95.0  | -        | -     |
| early repolarization                                                 | 7        | 85.7  | -        | -     |
| ectopic atrial bradycardia                                           | 60       | 88.3  | -        | -     |
| ectopic atrial rhythm                                                | 60       | 73.3  | -        | -     |
| ectopic atrial tachycardia                                           | 60       | 91.7  | -        | -     |
| electronic atrial pacing                                             | 60       | 83.3  | -        | -     |
| extreme tachycardia                                                  | 59       | 93.2  | -        | -     |
| first degree AV block                                                | 60       | 83.3  | 63       | 66.7  |
| fusion complexes                                                     | 60       | 86.7  | -        | -     |
| high amplitude T-waves                                               | 60       | 91.7  | -        | -     |
| high grade AV block                                                  | 58       | 77.6  | -        | -     |
| high P-voltages                                                      | 426      | 82.4  | -        | -     |
| high QRS voltage                                                     | 600      | 86.8  | 145      | 86.2  |
| hypertrophy                                                          | 60       | 83.3  | 60       | 88.3  |
| idioventricular rhythm                                               | 60       | 86.7  | -        | -     |
| incomplete left bundle branch block                                  | 60       | 91.7  | 51       | 92.2  |
| incomplete right bundle branch block                                 | 60       | 88.3  | 69       | 71.0  |
| intermittent second degree AV block                                  | 60       | 80.0  | -        | -     |
| intraventricular conduction disturbance                              | 60       | 88.3  | -        | -     |
| inverted T-waves                                                     | 60       | 70.0  | 621      | 82.0  |
| ischemic in anterior leads                                           | -        | -     | 32       | 84.4  |
| ischemic in anterolateral leads                                      | -        | -     | 80       | 61.3  |
| ischemic in anteroseptal leads                                       | -        | -     | 63       | 84.1  |
| ischemic in inferior leads                                           | -        | -     | 66       | 74.2  |
| ischemic in inferolateral leads                                      | -        | -     | 67       | 62.7  |
| ischemic in lateral leads                                            | -        | -     | 55       | 65.5  |
| ischemic ST-T changes                                                | 60       | 85.0  | -        | -     |
| ischemic ST-T changes in anterior leads                              | 80       | 66.2  | -        | -     |
| ischemic ST-T changes in anteroseptal leads                          | 80       | 68.8  | -        | -     |
| ischemic ST-T changes in diffuse leads                               | 60       | 65.0  | -        | -     |
| ischemic ST-T changes in inferior leads                              | 80       | 62.5  | -        | -     |
| ischemic ST-T changes in inferoseptal leads                          | 80       | 77.5  | -        | -     |
| ischemic ST-T changes in lateral leads                               | 14       | 71.4  | -        | -     |
| ischemic ST-T changes in septal leads                                | 80       | 76.2  | -        | -     |
| junctional bradycardia                                               | 50       | 80.0  | -        | -     |
| junctional rhythm                                                    | 80       | 67.5  | -        | -     |

| Attribute                                                    | MIMIC |      | PTB-XL |       |
|--------------------------------------------------------------|-------|------|--------|-------|
|                                                              | n     | EM   | n      | EM    |
| junctional tachycardia                                       | 60    | 93.3 | -      | -     |
| late R wave transition                                       | 30    | 86.7 | -      | -     |
| left anterior fascicular block                               | 80    | 77.5 | 68     | 82.4  |
| left atrial overload/enlargement                             | 80    | 43.8 | 80     | 55.0  |
| left posterior fascicular block                              | 60    | 85.0 | 60     | 98.3  |
| Left ventricular hypertrophy                                 | 80    | 65.0 | 80     | 78.8  |
| long QT interval                                             | 60    | 88.3 | 52     | 78.8  |
| low amplitude t-wave                                         | -     | -    | 636    | 78.0  |
| low QRS voltage                                              | 1260  | 93.7 | -      | -     |
| low qrs voltages in the frontal and horizontal leads         | -     | -    | 126    | 88.1  |
| low R                                                        | 438   | 75.3 | -      | -     |
| Mobitz type 1 second-degree AV block                         | 60    | 73.3 | -      | -     |
| Mobitz type 2 second-degree AV block                         | 49    | 83.7 | -      | -     |
| multifocal premature ventricular complexes                   | 60    | 88.3 | -      | -     |
| Myocardial infarction                                        | 60    | 85.0 | 60     | 78.3  |
| Myocardial infarction in anterior leads                      | 80    | 71.2 | 80     | 67.5  |
| Myocardial infarction in anterolateral leads                 | 80    | 63.7 | 76     | 78.9  |
| Myocardial infarction in anteroseptal leads                  | 80    | 57.5 | 80     | 66.2  |
| Myocardial infarction in inferior leads                      | 80    | 67.5 | 80     | 75.0  |
| Myocardial infarction in inferolateral leads                 | 80    | 73.8 | 79     | 68.4  |
| myocardial infarction in inferoposterior leads               | -     | -    | 7      | 71.4  |
| myocardial infarction in inferoposterolateral leads          | -     | -    | 7      | 85.7  |
| Myocardial infarction in lateral leads                       | 80    | 66.2 | 49     | 81.6  |
| Myocardial infarction in posterior leads                     | 80    | 75.0 | 7      | 85.7  |
| Myocardial infarction in septal leads                        | 80    | 72.5 | -      | -     |
| non-diagnostic T abnormalities                               | 1260  | 87.2 | 743    | 79.3  |
| non-specific intraventricular conduction disturbance (block) | -     | -    | 63     | 76.2  |
| non-specific ischemic                                        | -     | -    | 80     | 70.0  |
| non-specific ST changes                                      | 1080  | 77.6 | 456    | 77.4  |
| non-specific ST depression                                   | 198   | 85.9 | 656    | 80.5  |
| non-specific st elevation                                    | -     | -    | 24     | 83.3  |
| non-specific t abnormality                                   | 1260  | 78.4 | -      | -     |
| non-specific T-wave changes                                  | 1080  | 77.9 | 684    | 75.4  |
| non-sustained ventricular tachycardia                        | 60    | 93.3 | -      | -     |
| Normal ECG                                                   | 60    | 85.0 | 60     | 86.7  |
| normal functioning artificial pacemaker                      | -     | -    | 48     | 100.0 |
| notched P wave                                               | 49    | 83.7 | -      | -     |
| P wave abnormality                                           | 60    | 73.3 | -      | -     |
| pacemaker activity                                           | 60    | 85.0 | -      | -     |
| pacemaker rhythm                                             | 60    | 96.7 | -      | -     |
| paired ventricular premature complexes                       | 60    | 80.0 | -      | -     |
| paroxysmal idioventricular rhythm                            | 60    | 73.3 | -      | -     |
| poor R wave progression                                      | 420   | 76.0 | -      | -     |
| premature atrial complexes                                   | 60    | 73.3 | -      | -     |
| premature ventricular complexes                              | 60    | 85.0 | -      | -     |
| premature ventricular interpolated complexes                 | 60    | 83.3 | -      | -     |
| Prolonged PR interval                                        | 60    | 68.3 | 60     | 81.7  |
| prolonged QRS duration                                       | 60    | 85.0 | -      | -     |
| Q waves present                                              | 1039  | 80.2 | 647    | 83.2  |
| QRS changes in anteroseptal leads                            | 60    | 76.7 | -      | -     |
| QTc prolongation                                             | 60    | 73.3 | -      | -     |
| rapid ventricular response                                   | 60    | 88.3 | -      | -     |
| regular rhythm                                               | 60    | 76.7 | -      | -     |
| repolarization abnormality                                   | 1260  | 81.0 | -      | -     |
| Reversed R wave progression                                  | 52    | 82.7 | -      | -     |
| right atrial overload/enlargement                            | 60    | 85.0 | 58     | 91.4  |
| right ventricular conduction delay                           | 59    | 71.2 | -      | -     |
| Right ventricular hypertrophy                                | 80    | 70.0 | -      | -     |
| rSr' type in V1 or V2                                        | 60    | 95.0 | -      | -     |
| S1 S2 S3 type QRS pattern                                    | 36    | 91.7 | -      | -     |
| second degree AV block                                       | 60    | 78.3 | -      | -     |
| second-degree SA block type II                               | 60    | 68.3 | -      | -     |
| Short PR interval                                            | 60    | 70.0 | -      | -     |
| short QT interval                                            | 60    | 78.3 | -      | -     |
| short QTc                                                    | 30    | 86.7 | -      | -     |
| Significant repolarization change                            | 60    | 73.3 | -      | -     |
| sinus arrhythmia                                             | 60    | 60.0 | 60     | 71.7  |
| sinus bradycardia                                            | 60    | 95.0 | 60     | 83.3  |
| sinus pause                                                  | 60    | 71.7 | -      | -     |
| sinus rhythm                                                 | 60    | 80.0 | 60     | 76.7  |
| sinus tachycardia                                            | 80    | 92.5 | 60     | 98.3  |
| slow ventricular response                                    | 60    | 91.7 | -      | -     |
| ST Depression                                                | 1260  | 84.0 | -      | -     |
| ST Elevation                                                 | 1020  | 77.3 | -      | -     |
| ST(-T) change                                                | 1260  | 79.1 | -      | -     |
| st/t change                                                  | -     | -    | 60     | 78.3  |
| subendocardial injury in anterolateral leads                 | -     | -    | 61     | 88.5  |
| subendocardial injury in anteroseptal leads                  | -     | -    | 63     | 88.9  |
| subendocardial injury in inferolateral leads                 | -     | -    | 6      | 83.3  |
| subendocardial injury in lateral leads                       | -     | -    | 13     | 84.6  |
| supraventricular bigeminy BIGU bigeminal pattern             | 60    | 60.0 | -      | -     |

| Attribute                                               | MIMIC    |       | PTB-XL   |      |
|---------------------------------------------------------|----------|-------|----------|------|
|                                                         | <i>n</i> | EM    | <i>n</i> | EM   |
| supraventricular extrasystoles                          | 60       | 61.7  | –        | –    |
| supraventricular premature complex                      | 60       | 88.3  | –        | –    |
| supraventricular rhythm                                 | 60       | 71.7  | –        | –    |
| supraventricular tachycardia                            | 80       | 76.2  | 18       | 77.8 |
| T-wave abnormality                                      | 1260     | 79.9  | 150      | 80.7 |
| tall R wave in V1 or V2                                 | 60       | 93.3  | –        | –    |
| tall R wave in V5 or V6                                 | 57       | 86.0  | –        | –    |
| third degree AV block                                   | 60       | 81.7  | –        | –    |
| TU fusion                                               | 52       | 78.8  | –        | –    |
| unclassified aberrantly conducted complexes             | 60       | 78.3  | –        | –    |
| uncontrolled ventricular response                       | 60       | 98.3  | –        | –    |
| ventricular bigeminy                                    | 60       | 86.7  | –        | –    |
| ventricular couplet                                     | 60       | 80.0  | –        | –    |
| ventricular escape rhythm                               | 24       | 79.2  | –        | –    |
| ventricular premature complex                           | –        | –     | 60       | 88.3 |
| ventricular trigeminy                                   | 60       | 95.0  | –        | –    |
| ventricular-paced complexes or rhythm                   | 60       | 95.0  | –        | –    |
| Voltage criteria (QRS) for left ventricular hypertrophy | 60       | 88.3  | 180      | 88.3 |
| wandering pacemaker                                     | 36       | 77.8  | –        | –    |
| wide QRS tachycardia                                    | 60       | 95.0  | –        | –    |
| Wolff-Parkinson type A                                  | 6        | 83.3  | –        | –    |
| Wolff-Parkinson type B                                  | 50       | 82.0  | –        | –    |
| Wolff-Parkinson-White syndrome                          | 60       | 85.0  | –        | –    |
| <b>Heart axis</b>                                       |          |       |          |      |
| extreme axis deviation                                  | 60       | 90.0  | 57       | 93.0 |
| left axis deviation                                     | 60       | 66.7  | 60       | 80.0 |
| normal heart axis                                       | 60       | 76.7  | 60       | 93.3 |
| right axis deviation                                    | 60       | 93.3  | 60       | 93.3 |
| <b>Stage of infarction</b>                              |          |       |          |      |
| early stage of myocardial infarction                    | 60       | 83.3  | 59       | 89.8 |
| middle stage of myocardial infarction                   | 60       | 80.0  | 60       | 80.0 |
| old stage of myocardial infarction                      | 60       | 71.7  | 49       | 77.6 |
| <b>Noise</b>                                            |          |       |          |      |
| any kind of noises                                      | –        | –     | 780      | 65.9 |
| baseline drift                                          | –        | –     | 780      | 66.7 |
| baseline wander                                         | 148      | 79.1  | –        | –    |
| burst noise                                             | –        | –     | 777      | 68.1 |
| electrodes problems                                     | –        | –     | 66       | 81.8 |
| static noise                                            | –        | –     | 780      | 69.1 |
| <b>Numeric features</b>                                 |          |       |          |      |
| above the normal range of p duration                    | 60       | 68.3  | 60       | 68.3 |
| above the normal range of pr interval                   | 60       | 81.7  | 60       | 83.3 |
| above the normal range of qrs duration                  | 60       | 78.3  | 60       | 78.3 |
| above the normal range of qt corrected                  | 60       | 70.0  | 60       | 75.0 |
| above the normal range of qt interval                   | 60       | 81.7  | 60       | 70.0 |
| above the normal range of rr interval                   | 60       | 91.7  | 60       | 98.3 |
| below the normal range of pr interval                   | 60       | 66.7  | 60       | 61.7 |
| below the normal range of qrs duration                  | 60       | 85.0  | 60       | 85.0 |
| below the normal range of qt corrected                  | 60       | 78.3  | 60       | 81.7 |
| below the normal range of qt interval                   | 60       | 81.7  | 60       | 83.3 |
| below the normal range of rr interval                   | 60       | 100.0 | 60       | 93.3 |
| within the normal range of p duration                   | 60       | 73.3  | 60       | 65.0 |
| within the normal range of pr interval                  | 60       | 68.3  | 60       | 71.7 |
| within the normal range of qrs duration                 | 60       | 78.3  | 60       | 63.3 |
| within the normal range of qt corrected                 | 60       | 70.0  | 60       | 73.3 |
| within the normal range of qt interval                  | 60       | 73.3  | 60       | 76.7 |
| within the normal range of rr interval                  | 60       | 100.0 | 60       | 95.0 |
| <b>Extra systole</b>                                    |          |       |          |      |
| any kind of extra systoles                              | –        | –     | 50       | 82.0 |
| extrasystoles                                           | –        | –     | 60       | 81.7 |
| supraventricular extrasystoles                          | –        | –     | 60       | 66.7 |
| ventricular extrasystoles                               | –        | –     | 60       | 80.0 |

## 9 Fields used for structured-record QA generation

Table 9: Dataset-specific fields used to construct structured per-study records for synthetic QA generation.

| Field                                           | Dataset                                          | Comment                                                                                                                             |
|-------------------------------------------------|--------------------------------------------------|-------------------------------------------------------------------------------------------------------------------------------------|
| <b>Patient context</b>                          |                                                  |                                                                                                                                     |
| Patient age                                     | UK Biobank,<br>MIMIC-IV-ECG,<br>EchoNext, PTB-XL | MIMIC-IV-ECG uses approximate anchor age.                                                                                           |
| Patient sex                                     | UK Biobank,<br>MIMIC-IV-ECG,<br>EchoNext, PTB-XL | –                                                                                                                                   |
| BMI                                             | UK Biobank                                       | –                                                                                                                                   |
| Height                                          | UK Biobank                                       | –                                                                                                                                   |
| Body surface area                               | UK Biobank                                       | Used for indexed CMR reference ranges.                                                                                              |
| Chest pain or discomfort                        | UK Biobank                                       | –                                                                                                                                   |
| Shortness of breath on level ground             | UK Biobank                                       | –                                                                                                                                   |
| Race or ethnicity                               | EchoNext                                         | –                                                                                                                                   |
| <b>ECG measurements</b>                         |                                                  |                                                                                                                                     |
| ECG heart rate                                  | MIMIC-IV-ECG, UK<br>Biobank                      | In MIMIC-IV-ECG, derived from RR interval if heart rate is unavailable.                                                             |
| Ventricular rate                                | EchoNext                                         | –                                                                                                                                   |
| Atrial rate                                     | EchoNext                                         | –                                                                                                                                   |
| RR interval                                     | MIMIC-IV-ECG, UK<br>Biobank                      | –                                                                                                                                   |
| PP interval                                     | MIMIC-IV-ECG, UK<br>Biobank                      | –                                                                                                                                   |
| PR interval                                     | MIMIC-IV-ECG, EchoNext                           | –                                                                                                                                   |
| PQ interval                                     | MIMIC-IV-ECG, UK<br>Biobank                      | Derived from P onset and Q onset when needed.                                                                                       |
| P duration                                      | MIMIC-IV-ECG, UK<br>Biobank                      | Derived from P onset and P offset when needed.                                                                                      |
| QRS duration                                    | MIMIC-IV-ECG, UK<br>Biobank, EchoNext            | In MIMIC-IV-ECG, derived from QRS onset and QRS end when needed.                                                                    |
| QT interval                                     | MIMIC-IV-ECG, UK<br>Biobank                      | Used to derive QTc when needed.                                                                                                     |
| QTc interval                                    | MIMIC-IV-ECG, UK<br>Biobank, EchoNext            | In MIMIC-IV-ECG and UK Biobank, derived from QT and RR when needed.                                                                 |
| P axis                                          | MIMIC-IV-ECG, UK<br>Biobank                      | –                                                                                                                                   |
| R axis                                          | MIMIC-IV-ECG, UK<br>Biobank, PTB-XL              | In PTB-XL, heart-axis labels are mapped to unified R-axis categories. MID: normal; LAD and ALAD: leftward; RAD and ARAD: rightward. |
| T axis                                          | MIMIC-IV-ECG, UK<br>Biobank                      | –                                                                                                                                   |
| <b>ECG report-derived fields</b>                |                                                  |                                                                                                                                     |
| ECG diagnosis and machine-report diagnosis text | MIMIC-IV-ECG, UK<br>Biobank                      | ECG diagnosis is retained as text. For MIMIC-IV-ECG, diagnosis text is built from machine-measurement report columns.               |
| German ECG report                               | PTB-XL                                           | Original PTB-XL report text.                                                                                                        |
| English ECG report                              | PTB-XL                                           | English translation of the PTB-XL report generated using GPT-OSS-20B.                                                               |
| SCP-ECG diagnostic codes                        | PTB-XL                                           | SCP codes are decoded into textual diagnostic descriptions.                                                                         |
| Infarction stage                                | PTB-XL                                           | –                                                                                                                                   |
| <b>CMR-derived fields</b>                       |                                                  |                                                                                                                                     |
| LV end diastolic volume                         | UK Biobank                                       | –                                                                                                                                   |
| LV end systolic volume                          | UK Biobank                                       | –                                                                                                                                   |
| LV stroke volume                                | UK Biobank                                       | –                                                                                                                                   |
| LV myocardial mass                              | UK Biobank                                       | –                                                                                                                                   |
| LV ejection fraction                            | UK Biobank                                       | –                                                                                                                                   |
| LV cardiac output                               | UK Biobank                                       | –                                                                                                                                   |
| Cardiac index                                   | UK Biobank                                       | –                                                                                                                                   |
| LV mean myocardial wall thickness global        | UK Biobank                                       | –                                                                                                                                   |
| LV circumferential strain global                | UK Biobank                                       | –                                                                                                                                   |
| LV longitudinal strain global                   | UK Biobank                                       | –                                                                                                                                   |
| LV radial strain global                         | UK Biobank                                       | –                                                                                                                                   |
| RV end diastolic volume                         | UK Biobank                                       | –                                                                                                                                   |

| Field                                                         | Dataset    | Comment                                                             |
|---------------------------------------------------------------|------------|---------------------------------------------------------------------|
| RV end systolic volume                                        | UK Biobank | –                                                                   |
| RV stroke volume                                              | UK Biobank | –                                                                   |
| RV ejection fraction                                          | UK Biobank | –                                                                   |
| LA maximum volume                                             | UK Biobank | –                                                                   |
| LA minimum volume                                             | UK Biobank | –                                                                   |
| LA stroke volume                                              | UK Biobank | –                                                                   |
| LA ejection fraction                                          | UK Biobank | –                                                                   |
| RA maximum volume                                             | UK Biobank | –                                                                   |
| RA minimum volume                                             | UK Biobank | –                                                                   |
| RA stroke volume                                              | UK Biobank | –                                                                   |
| RA ejection fraction                                          | UK Biobank | –                                                                   |
| Ascending aorta distensibility                                | UK Biobank | –                                                                   |
| Descending aorta distensibility                               | UK Biobank | –                                                                   |
| <b>EchoNext echocardiographic categorical fields</b>          |            |                                                                     |
| Aortic stenosis                                               | EchoNext   | Severity category.                                                  |
| Aortic regurgitation                                          | EchoNext   | Severity category.                                                  |
| Mitral regurgitation                                          | EchoNext   | Severity category.                                                  |
| Tricuspid regurgitation                                       | EchoNext   | Severity category.                                                  |
| Pulmonary regurgitation                                       | EchoNext   | Severity category.                                                  |
| Right ventricular systolic function                           | EchoNext   | Qualitative systolic function category.                             |
| Pericardial effusion                                          | EchoNext   | Presence and size category.                                         |
| <b>EchoNext echocardiographic numeric fields</b>              |            |                                                                     |
| Interventricular septal thickness                             | EchoNext   | –                                                                   |
| Left ventricular posterior wall thickness                     | EchoNext   | –                                                                   |
| Left ventricular systolic function                            | EchoNext   | Derived from LVEF value in percent.                                 |
| <b>EchoNext binary structural heart disease fields</b>        |            |                                                                     |
| Left ventricular ejection fraction is 45% or lower            | EchoNext   | Binary descriptor derived from LVEF.                                |
| Left ventricular wall thickness is at least 1.3 cm            | EchoNext   | Binary descriptor derived from LV wall thickness.                   |
| Aortic stenosis is moderate or greater                        | EchoNext   | Binary descriptor derived from aortic stenosis severity.            |
| Aortic regurgitation is moderate or greater                   | EchoNext   | Binary descriptor derived from aortic regurgitation severity.       |
| Mitral regurgitation is moderate or greater                   | EchoNext   | Binary descriptor derived from mitral regurgitation severity.       |
| Tricuspid regurgitation is moderate or greater                | EchoNext   | Binary descriptor derived from tricuspid regurgitation severity.    |
| Pulmonary regurgitation is moderate or greater                | EchoNext   | Binary descriptor derived from pulmonary regurgitation severity.    |
| Right ventricular systolic dysfunction is moderate or greater | EchoNext   | Binary descriptor derived from right ventricular systolic function. |
| Pericardial effusion is moderate or large                     | EchoNext   | Binary descriptor derived from pericardial effusion size.           |
| Pulmonary artery systolic pressure is at least 45 mmHg        | EchoNext   | Binary descriptor derived from PASP.                                |
| Tricuspid regurgitation max velocity is at least 3.2 m/s      | EchoNext   | Binary descriptor derived from maximum TR jet velocity.             |

## 10 Clinical categorization rules

Table 10: Clinical categorisation rules used to convert numeric measurements into textual descriptors before synthetic QA generation.

| Measurement                                                                                                            | Categorisation rule                                                                                                                                                                                                                                                                                                                   |
|------------------------------------------------------------------------------------------------------------------------|---------------------------------------------------------------------------------------------------------------------------------------------------------------------------------------------------------------------------------------------------------------------------------------------------------------------------------------|
| <b>ECG measurements</b>                                                                                                |                                                                                                                                                                                                                                                                                                                                       |
| ECG heart rate [bpm], ventricular rate, atrial rate                                                                    | $\leq 50$ : marked bradycardia; $> 50$ to $\leq 60$ : bradycardia; $> 60$ to $\leq 100$ : normal; $> 100$ to $\leq 120$ : mild tachycardia; $> 120$ : marked tachycardia.                                                                                                                                                             |
| RR interval [ms], PP interval [ms]                                                                                     | Convert interval to rate as $60000/\text{interval}$ . Rate $> 120$ : markedly short; $> 100$ to $\leq 120$ : short; $\geq 60$ to $\leq 100$ : normal; $\geq 50$ to $< 60$ : prolonged; $< 50$ : markedly prolonged.                                                                                                                   |
| P duration [ms]                                                                                                        | If missing, derive as P offset – P onset. Then categorise as: $< 120$ : normal; $\geq 120$ : prolonged.                                                                                                                                                                                                                               |
| PQ interval [ms], PR interval [ms]                                                                                     | If PQ is missing, derive as Q onset – P onset. Then categorise as: $< 120$ : short; 120–200: normal; $> 200$ : prolonged.                                                                                                                                                                                                             |
| QRS duration [ms]                                                                                                      | $< 110$ : normal; $\geq 110$ to $< 120$ : mildly prolonged; $\geq 120$ : prolonged.                                                                                                                                                                                                                                                   |
| QTC interval [ms]                                                                                                      | If QTC is unavailable, derive it from QT and RR using Bazett correction: $QTc = QT/\sqrt{RR/1000}$ . Female: $\leq 470$ : normal; $> 470$ to $\leq 490$ : borderline; $> 490$ : prolonged. Male or unavailable sex: $\leq 450$ : normal; $> 450$ to $\leq 480$ : borderline; $> 480$ : prolonged.                                     |
| P axis [degrees]                                                                                                       | $< 0$ : leftward; 0–75: normal; $> 75$ : rightward.                                                                                                                                                                                                                                                                                   |
| R axis [degrees]                                                                                                       | $< -30$ : leftward; $-30$ –90: normal; $> 90$ : rightward.                                                                                                                                                                                                                                                                            |
| T axis [degrees]                                                                                                       | $< -15$ : leftward; $-15$ to $< 15$ : borderline; 15–75: normal; $> 75$ to $\leq 105$ : borderline; $> 105$ : rightward.                                                                                                                                                                                                              |
| <b>Ventricular function and cardiac output</b>                                                                         |                                                                                                                                                                                                                                                                                                                                       |
| LV ejection fraction, left ventricular systolic function                                                               | Female: $< 30$ : severely reduced; $\geq 30$ to $< 40$ : moderately reduced; $\geq 40$ to $< 52$ : mildly reduced; 52–79: normal; $> 79$ : hyperdynamic. Male or unavailable sex: $< 30$ : severely reduced; $\geq 30$ to $< 40$ : moderately reduced; $\geq 40$ to $< 49$ : mildly reduced; 49–79: normal; $> 79$ : hyperdynamic.    |
| RV ejection fraction                                                                                                   | Female: $< 30$ : severely reduced; $\geq 30$ to $< 40$ : moderately reduced; $\geq 40$ to $< 46$ : mildly reduced; 46–74: normal; $> 74$ : hyperdynamic. Male or unavailable sex: $< 30$ : severely reduced; $\geq 30$ to $< 40$ : moderately reduced; $\geq 40$ to $< 42$ : mildly reduced; 42–72: normal; $> 72$ : hyperdynamic.    |
| cardiac index [litres/min/m <sup>2</sup> ]                                                                             | $< 2.2$ : low output; 2.2 to $\leq 2.5$ : borderline low; $> 2.5$ to $\leq 4.0$ : normal; $> 4.0$ to $\leq 4.5$ : borderline high; $> 4.5$ : high output.                                                                                                                                                                             |
| LV cardiac output                                                                                                      | If body surface area is available, first compute cardiac index and apply the cardiac-index rule. Otherwise, use absolute ranges. Male 3.4–7.8: normal; female 2.7–6.3: normal; unknown sex 2.7–7.8: normal. Below range: low output; above range: high output.                                                                        |
| LV mean myocardial wall thickness global                                                                               | $< 5.0$ : thinned; 5.0–11.0: normal; $> 11.0$ : hypertrophied.                                                                                                                                                                                                                                                                        |
| Echocardiographic LV wall thickness [cm], interventricular septal thickness, left ventricular posterior wall thickness | $< 0.6$ : thinned. Male: $\leq 1.0$ : normal; $> 1.0$ to $\leq 1.3$ : mildly increased; $> 1.3$ to $\leq 1.6$ : moderately increased; $> 1.6$ : severely increased. Female or unknown sex: $\leq 0.9$ : normal; $> 0.9$ to $\leq 1.2$ : mildly increased; $> 1.2$ to $\leq 1.5$ : moderately increased; $> 1.5$ : severely increased. |
| <b>CMR ventricular volumes, stroke volume, and mass</b>                                                                |                                                                                                                                                                                                                                                                                                                                       |
| LV end diastolic volume                                                                                                | If body surface area is available, use indexed range: male 50–108: normal; female 50–96: normal. Otherwise use absolute range: male 95–215: normal; female 78–167: normal. Below range: small; above range: dilated.                                                                                                                  |
| LV end systolic volume                                                                                                 | If body surface area is available, use indexed range: male 11–47: normal; female 10–40: normal. Otherwise use absolute range: male 23–100: normal; female 18–73: normal. Below range: small; above range: dilated.                                                                                                                    |
| LV stroke volume                                                                                                       | If body surface area is available, use indexed range: male 33–72: normal; female 33–64: normal. Otherwise use absolute range: male 60–135: normal; female 47–99: normal. Below range: reduced; above range: increased.                                                                                                                |
| LV myocardial mass                                                                                                     | If body surface area is available, use indexed range: male 39–85: normal; female 30–68: normal. Otherwise use absolute range: male 73–171: normal; female 61–121: normal. Below range: decreased; above range: increased.                                                                                                             |
| RV end diastolic volume                                                                                                | If body surface area is available, use indexed range: male 53–123: normal; female 48–104: normal. Otherwise use absolute range: male 105–258: normal; female 84–193: normal. Below range: small; above range: dilated.                                                                                                                |
| RV end systolic volume                                                                                                 | If body surface area is available, use indexed range: male 17–59: normal; female 13–48: normal. Otherwise use absolute range: male 34–123: normal; female 22–86: normal. Below range: small; above range: dilated.                                                                                                                    |
| RV stroke volume                                                                                                       | If body surface area is available, use indexed range: male 28–75: normal; female 29–66: normal. Otherwise use absolute range: male 57–141: normal; female 44–116: normal. Below range: reduced; above range: increased.                                                                                                               |
| <b>CMR atrial volumes and function</b>                                                                                 |                                                                                                                                                                                                                                                                                                                                       |

| Measurement                                   | Categorisation rule                                                                                                                                                                                                                                                   |
|-----------------------------------------------|-----------------------------------------------------------------------------------------------------------------------------------------------------------------------------------------------------------------------------------------------------------------------|
| LA maximum volume                             | If body surface area is available, use indexed range: male 17–59: normal; female 17–61: normal. Otherwise use absolute range: male 31–112: normal; female 28–100: normal. Below range: small; above range: dilated.                                                   |
| LA minimum volume                             | If body surface area is available, use indexed range: male 3–24: normal; female 4–23: normal. Otherwise use absolute range: male 6–44: normal; female 7–38: normal. Below range: small; above range: dilated.                                                         |
| LA stroke volume                              | If body surface area is available, use indexed range: male 10–34: normal; female 10–34: normal. Otherwise use absolute range: male 21–67: normal; female 21–62: normal. Below range: reduced; above range: increased.                                                 |
| LA ejection fraction                          | Male 43–75: normal; female 47–75: normal. Below range: reduced; above range: hyperdynamic.                                                                                                                                                                            |
| RA maximum volume                             | If body surface area is available, use indexed range: male 32–79: normal; female 31–69: normal. Otherwise use absolute range: male 59–158: normal; female 49–122: normal. Below range: small; above range: dilated.                                                   |
| RA minimum volume                             | If body surface area is available, use indexed range: male 10–42: normal; female 8–32: normal. Otherwise use absolute range: male 16–84: normal; female 11–55: normal. Below range: small; above range: dilated.                                                      |
| RA stroke volume                              | If body surface area is available, use indexed range: male 14–46: normal; female 14–42: normal. Otherwise use absolute range: male 26–90: normal; female 23–71: normal. Below range: reduced; above range: increased.                                                 |
| RA ejection fraction                          | Male 34–74: normal; female 41–77: normal. Below range: reduced; above range: hyperdynamic.                                                                                                                                                                            |
| <b>Global strain</b>                          |                                                                                                                                                                                                                                                                       |
| LV circumferential strain global              | Male –27.2 to –14.6: normal; female –29.2 to –16.2: normal. Value above the upper limit: reduced magnitude; value below the lower limit: increased magnitude.                                                                                                         |
| LV longitudinal strain global                 | Male –26.1 to –12.7: normal; female –28.7 to –14.2: normal. Value above the upper limit: reduced magnitude; value below the lower limit: increased magnitude.                                                                                                         |
| LV radial strain global                       | Male and female 20.0–55.0: normal. Below range: reduced magnitude; above range: increased magnitude.                                                                                                                                                                  |
| <b>Aortic distensibility</b>                  |                                                                                                                                                                                                                                                                       |
| Ascending aorta distensibility                | Male age $\leq$ 54: 0.7–5.1: normal; male age 55–64: 0.0–4.2: normal; male age $>$ 64: 0.0–2.4: normal. Female age $\leq$ 54: 0.5–5.7: normal; female age 55–64: 0.0–3.9: normal; female age $>$ 64: 0.0–2.7: normal. Below range: decreased; above range: increased. |
| Descending aorta distensibility               | Male age $\leq$ 54: 1.6–6.0: normal; male age 55–64: 0.7–5.1: normal; male age $>$ 64: 0.4–4.0: normal. Female age $\leq$ 54: 1.6–6.0: normal; female age 55–64: 0.6–4.6: normal; female age $>$ 64: 0.4–3.6: normal. Below range: decreased; above range: increased. |
| <b>EchoNext binary echocardiography rules</b> |                                                                                                                                                                                                                                                                       |
| LVEF $\leq$ 45%                               | Binary descriptor: yes if left ventricular ejection fraction is 45% or lower; otherwise no.                                                                                                                                                                           |
| LV wall thickness $\geq$ 1.3 cm               | Binary descriptor: yes if left ventricular wall thickness is at least 1.3 cm; otherwise no.                                                                                                                                                                           |
| Aortic stenosis $\geq$ moderate               | Binary descriptor: yes if aortic stenosis is moderate or greater; otherwise no.                                                                                                                                                                                       |
| Aortic regurgitation $\geq$ moderate          | Binary descriptor: yes if aortic regurgitation is moderate or greater; otherwise no.                                                                                                                                                                                  |
| Mitral regurgitation $\geq$ moderate          | Binary descriptor: yes if mitral regurgitation is moderate or greater; otherwise no.                                                                                                                                                                                  |
| Tricuspid regurgitation $\geq$ moderate       | Binary descriptor: yes if tricuspid regurgitation is moderate or greater; otherwise no.                                                                                                                                                                               |
| Pulmonary regurgitation $\geq$ moderate       | Binary descriptor: yes if pulmonary regurgitation is moderate or greater; otherwise no.                                                                                                                                                                               |
| RV systolic dysfunction $\geq$ moderate       | Binary descriptor: yes if right ventricular systolic dysfunction is moderate or greater; otherwise no.                                                                                                                                                                |
| Pericardial effusion moderate or large        | Binary descriptor: yes if pericardial effusion is moderate or large; otherwise no.                                                                                                                                                                                    |
| PASP $\geq$ 45 mmHg                           | Binary descriptor: yes if pulmonary artery systolic pressure is at least 45 mmHg; otherwise no.                                                                                                                                                                       |
| TR maximum velocity $\geq$ 3.2 m/s            | Binary descriptor: yes if tricuspid regurgitation maximum velocity is at least 3.2 m/s; otherwise no.                                                                                                                                                                 |

## 11 ECG-LLM Chat Template

During ECG-LLM instruction tuning and evaluation, each example was serialized as a chat conversation with a fixed system message, a user message containing the ECG token placeholder and clinical question, and an assistant message containing the target answer. The ECG token placeholder denotes the projected ECG-token sequence inserted into the LLM input embedding stream.

### ECG-LLM chat template

System:

You are a cardiology assistant. The user will provide ECG data after the phrase "Here is the  
↪ ECG:" followed by a clinical question. Answer the question directly using only findings  
↪ supported by the ECG and available patient context. Do not invent unsupported findings,  
↪ reason only on the provided ECG.

User:

Here is the ECG: <ecg\_tokens>  
<question\_tokens>

Assistant:

<answer\_tokens>

## 12 Question Answer Generation Prompts

The following prompts were used to generate question-answer pairs for training. Dataset-specific prompt variants were used for UK Biobank, EchoNext, MIMIC-IV-ECG, and PTB-XL according to the structured fields available in each cohort. For UK Biobank and EchoNext, we additionally generated reasoning-style QA pairs. In these examples, the generator returned separate `reasoning` and `answer` fields. During training, the model input was the generated question, and the target response was formed by concatenating the reasoning field with the final answer field.

### Prompt for standard QA generation with UK Biobank data

Create N question-answer pairs from this text for LLM training in English.

#### BEHAVIOR:

- Simulate an interaction via QA pairs between a General Practitioner (GP) and a perfect AI system for ECG interpretation.
- The GP asks questions about this ECG, and the AI answers.
- The GP sees only the ECG and asks clinically meaningful, open-ended questions about this patient to obtain a comprehensive understanding of the patient's cardiac condition and abnormalities.
- The AI may internally use all provided information from the text.
- The AI must always answer as if the insights come purely from ECG interpretation.
- Answers should use as much provided information as possible, combining several fields to provide a comprehensive picture of the patient's cardiac status and abnormalities.
- Do not invent diagnoses, numbers, thresholds, or advice not supported by the provided fields.
- These QA pairs are intended for LLM fine-tuning. Across the full set of generated pairs, they should collectively reflect the patient's overall cardiac state, major abnormalities, and all clinically relevant supported findings in the text.

#### QUESTIONS (GP):

- Questions must sound like a GP asking about the ECG of this specific patient.
- Questions must not state or assume specific ECG diagnoses, measurements, or values.
- Do not ask about information that is not present in the text.
- Do not include the findings in the question. For example, do not ask: "If sinus bradycardia is present...", "Given LV dilatation...", or "If EF is reduced...".
- Instead, ask the AI to interpret, describe, and highlight abnormalities and to identify all relevant findings.
- Questions may reflect uncertainty or clinical curiosity, for example: "Does the ECG suggest ...?", "Could this ECG indicate ...?", "Do you see any signs of ...?", or "Is there evidence of ...?".

#### ANSWERS (AI):

- The AI has access to all information in the text, but must formulate answers as if the insights come purely from ECG interpretation.
- Answers must contain several clear sentences, with a direct and unambiguous answer to the question.
- Answers must include as much relevant information as possible about the patient's cardiac condition and abnormalities, combining several fields where appropriate.
- All answers must be directly supported by the provided fields and must never contradict any given measurements.
- Never mention anything not present in the provided text.

#### OUTPUT FORMAT (STRICT):

Return only valid JSON in this exact format:

```
[
  {
    "question": "Question 1?",
    "answer": "Answer 1."
  },
]
```

```
  {{
    "question": "Question 2?",
    "answer": "Answer 2."
  }}
]
```

Text:  
{text}

### Prompt for reasoning-style QA generation with UK Biobank data

Create N complex reasoning-style question-answer examples from this text for LLM training in  
↪ English.

#### BEHAVIOR:

- Simulate an interaction via QA pairs between a General Practitioner (GP) and a perfect AI  
↪ system for ECG interpretation.
- The GP asks questions about this ECG, and the AI answers.
- The GP sees only the ECG and asks clinically meaningful, open-ended questions about this  
↪ patient to obtain a comprehensive understanding of the patient's cardiac condition and  
↪ abnormalities.
- The AI may internally use all provided information from the text.
- The AI must always answer as if the insights come purely from ECG interpretation.
- Answers should use as much provided information as possible, combining several fields to  
↪ provide a comprehensive picture of the patient's cardiac status and abnormalities.
- Do not invent diagnoses, numbers, thresholds, or advice not supported by the provided  
↪ fields.
- These examples are intended for LLM fine-tuning. Across the full set of generated examples,  
↪ they should collectively reflect the patient's overall cardiac state, major  
↪ abnormalities, and all clinically relevant supported findings in the text.

#### QUESTIONS (GP):

- Questions must sound like a GP asking about the ECG of this specific patient.
- Questions must be clinically meaningful and require multi-step interpretation.
- Questions must not state or assume specific ECG diagnoses, measurements, or values.
- Do not ask about information that is not present in the text.
- Do not include the findings in the question. For example, do not ask: "If sinus bradycardia  
↪ is present...", "Given LV dilatation...", or "If EF is reduced...".
- Instead, ask the AI to interpret, describe, and highlight abnormalities and to identify all  
↪ relevant findings.
- Questions may reflect uncertainty or clinical curiosity, for example: "Does the ECG suggest  
↪ ...?", "Could this ECG indicate ...?", "Do you see any signs of ...?", or "Is there  
↪ evidence of ...?".

#### ANSWERS (AI):

- The AI has access to all information in the text, but must formulate answers as if the  
↪ insights come purely from ECG interpretation.
- Each example must contain:
  1. a challenging ECG-focused clinical question,
  2. a concise reasoning field that links the available findings step by step,
  3. a final answer that directly addresses the question.
- The reasoning must be clinically grounded and directly supported by the provided fields.
- The final answer must be concise, direct, and unambiguous.
- All reasoning and answers must be directly supported by the provided fields and must never  
↪ contradict any given measurements.
- Never mention anything not present in the provided text.

#### OUTPUT FORMAT (STRICT):

Return only valid JSON in this exact format:

```
[
  {{
    "question": "Complex question about this ECG?",
```

```

    "reasoning": "Step 1: ... Step 2: ... Step 3: ...",
    "answer": "Final answer based on the reasoning."
  }},
  {{
    "question": "Another complex question about this ECG?",
    "reasoning": "Step 1: ... Step 2: ... Step 3: ...",
    "answer": "Final answer based on the reasoning."
  }}
]

Text:
{text}

```

## Prompt for QA generation with MIMIC-IV-ECG data

Create N question-answer pairs from this text for LLM training in English.

### BEHAVIOR:

- Simulate an interaction between a General Practitioner (GP) and a PERFECT AI for ECG interpretation.
  - ↪ interpretation.
- The GP asks questions about this ECG, and the PERFECT AI answers.
- The GP sees only the ECG and asks clinically meaningful, open-ended questions about THIS patient to obtain a comprehensive understanding of the patient's heart condition and abnormalities.
  - ↪ abnormalities.
- PERFECT AI for ECG interpretation may internally use and reason with ALL provided information from the text (ECG phenotypes: + Patient demographics), but MUST answer as if insights come purely from perfect ECG interpretation.
- Questions and answers must be phrased as if inferred from ECG alone. Never mention records, reports, metadata, or models.
  - ↪ reports, metadata, or models.
- Do not invent diagnoses, numbers, thresholds, or advice not supported by the provided fields.
  - ↪ fields.
- These QA pairs are intended for LLM fine-tuning. Across the full set of generated pairs, they should collectively reflect the patient's overall cardiac state, major abnormalities, and all clinically relevant supported findings in the text.
  - ↪ they should collectively reflect the patient's overall cardiac state, major abnormalities, and all clinically relevant supported findings in the text.

### QUESTIONS (GP):

- Must sound like a GP interpreting and asking questions about the ECG of this specific patient.
  - ↪ patient.
- MUST NOT state or assume specific ECG diagnoses, measurements, or values in the question.
- Do not ask about information that is not present in the text.
- Do not include the findings in the question. Instead, ask the AI to interpret, describe, and highlight abnormalities and to explain all relevant findings.
  - ↪ and highlight abnormalities and to explain all relevant findings.
- May reflect uncertainty or clinical curiosity: "Does the ECG suggest ...?", "Could this ECG indicate...?", "Do you see any signs of...", "Is there evidence of...", etc.

### ANSWERS (AI):

- This is a PERFECT AI for ECG interpretation. It has access to all information in the text, but must formulate answers as if insights come purely from ECG interpretation.
  - ↪ but must formulate answers as if insights come purely from ECG interpretation.
- Answers must be several clear sentences, with a direct and unambiguous answer to the question.
  - ↪ question.
- Answers must include as much relevant information as possible about the patient's heart condition and abnormalities, combining several fields.
  - ↪ condition and abnormalities, combining several fields.
- All answers must be directly supported by the provided fields and must never contradict any given measurements.
  - ↪ given measurements.
- Never mention anything not present in the provided text.

### OUTPUT FORMAT (STRICT):

Return ONLY valid JSON in this exact format:

```

[
  {{
    "question": "Question 1?",
    "answer": "Answer 1."
  }}
]

```

```

    }},
    {{
      "question": "Question 2?",
      "answer": "Answer 2."
    }}
  ]

```

```

Text:
{text}

```

### Prompt for QA generation with PTB-XL data

Create N question-answer pairs from this text for LLM training in English.

#### BEHAVIOR:

- Simulate an interaction between a General Practitioner (GP) and a PERFECT AI for ECG
  - ↪ interpretation.
- The GP asks questions about this ECG, and the PERFECT AI answers.
- The GP sees only the ECG and asks clinically meaningful, open-ended questions about THIS
  - ↪ patient to obtain a comprehensive understanding of the patient's heart condition and
  - ↪ abnormalities.
- PERFECT AI for ECG interpretation may internally use and reason with ALL provided
  - ↪ information from the text.
- PERFECT AI for ECG interpretation ALWAYS answer as if insights come purely from ECG
  - ↪ analysis.
- The output QA pairs MUST be ONLY in English.
- Do not invent diagnoses, numbers, thresholds, or advice not supported by the provided
  - ↪ fields.
- These QA pairs are intended for LLM fine-tuning. Across the full set of generated pairs,
  - ↪ they should collectively reflect the patient's overall cardiac state, major
  - ↪ abnormalities, and all clinically relevant supported findings in the text.
- QA pairs must cover all findings from the text.

#### QUESTIONS (GP):

- Must sound like a GP interpreting and asking questions about the ECG of this specific
  - ↪ patient.
- NEVER include the findings from the text in the question. For example, do NOT say "If sinus
  - ↪ bradycardia is present...", "Given LV dilatation...", or "If EF is reduced...". Instead,
  - ↪ ask the AI to interpret, describe, and highlight abnormalities and to explain all
  - ↪ relevant findings.
- May reflect uncertainty or clinical curiosity: "Does the ECG suggest ...?", "Could this ECG
  - ↪ indicate...?", "Do you see any signs of...", "Is there evidence of...", etc.
- Do not ask about information that is not present in the text.

#### ANSWERS (AI):

- This is a PERFECT AI for ECG interpretation. It must formulate answers as if insights come
  - ↪ purely from ECG interpretation.
- Answers must be several clear sentences, with a direct and unambiguous answer to the
  - ↪ question.
- Answers must include as much relevant information as possible about the patient's heart
  - ↪ condition and abnormalities, combining several fields.
- All answers must be directly supported by the provided fields and must never contradict any
  - ↪ given measurements.
- Never mention anything not present in the provided text.

#### OUTPUT FORMAT (STRICT):

Return ONLY valid JSON in this exact format:

```

[
  {{
    "question": "Question 1?",
    "answer": "Answer 1."
  }},

```

```
  {{
    "question": "Question 2?",
    "answer": "Answer 2."
  }}
]
```

Text:  
{text}

### Prompt for QA generation with EchoNext data

Create N question-answer pairs from this text for LLM training in English.

#### BEHAVIOR:

- Simulate an interaction via QA pairs between a General Practitioner (GP) and a PERFECT AI  
↳ for ECG interpretation.
- The GP asks questions about this ECG, and the PERFECT AI answers.
- The GP sees only the ECG and asks clinically meaningful, open-ended questions about THIS  
↳ patient to obtain a comprehensive understanding of the patient's heart condition and  
↳ abnormalities.
- PERFECT AI for ECG interpretation may internally use and reason with ALL provided  
↳ information from the text.
- PERFECT AI for ECG interpretation ALWAYS answer as if insights come purely from ECG.
- Answers should cite as much provided information as possible, combing several fields to  
↳ provide a comprehensive picture of the patient's cardiac status and abnormalities.
- Do not invent diagnoses, numbers, thresholds, or advice not supported by the provided  
↳ fields.
- These QA pairs are intended for LLM fine-tuning. Across the full set of generated pairs,  
↳ they should collectively reflect the patient's overall cardiac state, major  
↳ abnormalities, and all clinically relevant supported findings in the text.

#### QUESTIONS (GP):

- Must sound like a GP asking questions about the ECG of this specific patient. GP asks  
↳ questions.
- MUST NOT state or assume specific ECG diagnoses, measurements, or values in the question.
- Do not ask about information that is not present in the text.
- Do not include the findings in the question. For example, do NOT say "If sinus bradycardia  
↳ is present...", "Given LV dilatation...", or "If EF is reduced...".
- Instead, ask the AI to interpret, describe, and highlight abnormalities and to find all  
↳ relevant abnormalities.
- Questions may reflect uncertainty or clinical curiosity: "Does the ECG suggest ...?",  
↳ "Could this ECG  
indicate...?", "Do you see any signs of...", "Is there evidence of...", etc.

#### ANSWERS (AI):

- This is a PERFECT AI for ECG interpretation. It has access to all information in the text,  
↳ and it must formulate answers as if insights come purely from ECG interpretation.
- Answers must be several clear sentences, with a direct and unambiguous answer to the  
↳ question.
- Answers must include as much relevant information as possible about the patient's heart  
↳ condition and abnormalities, combining several fields.
- All answers must be directly supported by the provided fields and must never contradict any  
↳ given measurements.
- Never mention anything not present in the provided text.

#### OUTPUT FORMAT (STRICT):

Return ONLY valid JSON in this exact format:

```
[
  {{
    "question": "Question 1?",
    "answer": "Answer 1."
  }},
]
```

```
{{
  "question": "Question 2?",
  "answer": "Answer 2."
}}
```

```
Text:
{text}
```

### Prompt for reasoning-style QA generation with EchoNext data

Create N complex reasoning examples from this text that demonstrate chain-of-thought  
↪ thinking.

#### BEHAVIOR:

- Simulate an interaction via QA pairs between a General Practitioner (GP) and a PERFECT AI  
↪ for ECG interpretation.
- The GP asks questions about this ECG, and the PERFECT AI answers.
- The GP sees only the ECG and asks clinically meaningful, open-ended questions about THIS  
↪ patient to obtain a comprehensive understanding of the patient's heart condition and  
↪ abnormalities.
- PERFECT AI for ECG interpretation may internally use and reason with ALL provided  
↪ information from the text.
- PERFECT AI for ECG interpretation ALWAYS answer as if insights come purely from ECG.
- Answers should cite as much provided information as possible, combing several fields to  
↪ provide a comprehensive picture of the patient's cardiac status and abnormalities.
- Do not invent diagnoses, numbers, thresholds, or advice not supported by the provided  
↪ fields.
- These QA pairs are intended for LLM fine-tuning. Across the full set of generated pairs,  
↪ they should collectively reflect the patient's overall cardiac state, major  
↪ abnormalities, and all clinically relevant supported findings in the text.

#### QUESTIONS (GP):

- Must sound like a GP asking questions about the ECG of this specific patient. GP asks  
↪ questions.
- MUST NOT state or assume specific ECG diagnoses, measurements, or values in the question.
- Do not ask about information that is not present in the text.
- Do not include the findings in the question. For example, do NOT say "If sinus bradycardia  
↪ is present...", "Given LV dilatation...", or "If EF is reduced...".
- Instead, ask the AI to interpret, describe, and highlight abnormalities and to find all  
↪ relevant abnormalities.
- Questions may reflect uncertainty or clinical curiosity: "Does the ECG suggest ...?",  
↪ "Could this ECG  
indicate...?", "Do you see any signs of...", "Is there evidence of...", etc.

#### ANSWERS (AI):

- This is a PERFECT AI for ECG interpretation. It has access to all information in the text,  
↪ and it must formulate answers as if insights come purely from ECG interpretation.
- Answers must be several clear sentences, with a direct and unambiguous answer to the  
↪ question.
- Answers must include as much relevant information as possible about the patient's heart  
↪ condition and abnormalities, combining several fields.
- All answers must be directly supported by the provided fields and must never contradict any  
↪ given measurements.
- Never mention anything not present in the provided text.

Each example should have:

1. A challenging question that requires step-by-step reasoning
2. Detailed reasoning steps that break down the problem
3. A concise final answer

Return JSON format only:

```
[
  {{
    "question": "Complex question about the text?",
    "reasoning": "Step 1: First, I need to consider...\nStep 2: Then, I analyze...\nStep 3:
    ↪ Finally, I can conclude...",
    "answer": "Final answer based on the reasoning."
  }},
  {{
    "question": "Another complex question?",
    "reasoning": "First, I'll analyze... Next, I need to determine... Based on this
    ↪ analysis...",
    "answer": "Final answer drawn from the reasoning."
  }}
]
```

Text:  
{text}

## 13 Implementation Details

| Parameter            | Value                                                          |
|----------------------|----------------------------------------------------------------|
| Input                | 12 leads $\times$ 5,000 samples                                |
| Patch size           | $1 \times 100$                                                 |
| ECG tokens           | 300 before masking                                             |
| Masking ratio        | 0.75                                                           |
| Loss                 | MSE over masked patches                                        |
| Encoder              | ViT, 12 layers, hidden size 768, 12 heads                      |
| Decoder              | Transformer, 2 layers, hidden size 512, 8 heads                |
| Activation           | GELU                                                           |
| Positional embedding | Learnable                                                      |
| Drop-path rate       | 0.1                                                            |
| Optimiser            | AdamW                                                          |
| Learning rate        | $2 \times 10^{-4}$                                             |
| Weight decay         | 0.05                                                           |
| Batch size           | 768                                                            |
| Precision            | bfloat16 mixed precision                                       |
| Training duration    | 120 epochs                                                     |
| Warm-up              | 1,000 steps                                                    |
| Minimum LR factor    | 0.01                                                           |
| Augmentations        | Random crop, Fourier surrogate perturbation, jitter, rescaling |

Table 11: ECG ViT-MAE pretraining configuration.

| Parameter            | Value                                                                                                           |
|----------------------|-----------------------------------------------------------------------------------------------------------------|
| ECG encoder          | Pretrained ViT-MAE, frozen                                                                                      |
| Language model       | Llama-3.1-8B-Instruct, frozen backbone                                                                          |
| ECG crop             | Random crop to 2,500 time-steps                                                                                 |
| ECG augmentations    | Disabled                                                                                                        |
| Projector            | Linear( $d_{ecg}, d_{lm}$ ), SiLU, Linear( $d_{lm}, d_{lm}$ )                                                   |
| Aggregation          | Identity; all ECG tokens preserved                                                                              |
| Projector bias       | Disabled                                                                                                        |
| LoRA modules         | <b>q_proj</b> , <b>k_proj</b> , <b>v_proj</b> , <b>o_proj</b>                                                   |
| LoRA rank / alpha    | 128 / 128                                                                                                       |
| LoRA dropout         | 0.1                                                                                                             |
| Curriculum           | First 1,500 steps update only the projector, then projector + LoRA training                                     |
| Optimiser            | Paged AdamW 8-bit                                                                                               |
| Learning rates       | Projector $10^{-4}$ ; LoRA $10^{-5}$                                                                            |
| Weight decay         | $10^{-3}$                                                                                                       |
| Schedule             | Linear warm-up from $0.1\times$ to peak LR over 3% of optimiser steps, then cosine decay to $0.3\times$ peak LR |
| Precision            | bfloat16 mixed precision                                                                                        |
| Training duration    | 1 epoch                                                                                                         |
| Batching             | 4 GPUs, batch size 8/GPU, gradient accumulation 4                                                               |
| Effective batch size | 128                                                                                                             |
| Max sequence length  | 1200 tokens                                                                                                     |

Table 12: ECG-LLM instruction-tuning configuration.

## 14 Diagnostic report generation prompts

| Model       | Diagnostic report generation prompt                                                                                                                                                                                                                                                                                                                                                                                                                                                          |
|-------------|----------------------------------------------------------------------------------------------------------------------------------------------------------------------------------------------------------------------------------------------------------------------------------------------------------------------------------------------------------------------------------------------------------------------------------------------------------------------------------------------|
| ECG-LLM     | Review the ECG signal and produce a detailed report on your diagnostic observations, ending with the final diagnosis.<br>Describe this ECG in detail and tell if there are any abnormalities present.<br>Review this ECG and provide an ECG diagnosis.<br>What is wrong with this ECG?<br>Provide an ECG report for this tracing.<br>What are the key diagnostic findings in this ECG?<br>Analyze this ECG carefully and provide a detailed ECG report.<br>What is the summary for this ECG? |
| ECG-Chat    | Could you please help me explain my ECG?                                                                                                                                                                                                                                                                                                                                                                                                                                                     |
| PULSE-7B    | Please write a clinical report based on this ECG image.                                                                                                                                                                                                                                                                                                                                                                                                                                      |
| MedGemma-4B | Please interpret this 12-lead ECG image. Provide a concise diagnostic report, including rhythm, rate if assessable, conduction or axis abnormalities if present, ST-T or infarction-related findings if present, and an overall ECG impression. If a finding is uncertain or not clearly visible, say so rather than inventing it.                                                                                                                                                           |

Table 13: Prompts used for ECG diagnostic summary generation. For ECG-LLM, one question was randomly selected from the ECG-LLM prompt pool for each ECG. For baseline models, the model-specific prompt shown in the table was used.

## 15 LLM-as-judge prompt for ECG diagnosis evaluation

The following prompts were used for LLM-based evaluation of generated ECG diagnostic answers against ground-truth diagnostic statements.

### System prompt for LLM-as-judge evaluation

```
You are a strict but clinically fair ECG diagnosis evaluator.

Compare MODEL ANSWER against GROUND TRUTH. Treat clinically equivalent wording as correct. Do not
↳ require identical phrasing.
Score correctness, completeness, and specificity independently.

Clinical equivalence rules:
- Borderline ECG, abnormal ECG, nonspecific, possible, probable, normal variant, and age-undetermined
↳ findings are lower-confidence/global findings.
- Do not strongly penalize missing uncertain findings if the main ECG interpretation is correct.
- Penalize missing GT findings under completeness and unsupported extra findings under specificity. Do
↳ not assign 0 if at least one meaningful GT finding is correctly identified. But don't assign 2 if
↳ important GT findings are missing or if the model adds unsupported major findings.

For PTB-XL ground truth: #Added only for PTB-XL evaluation
- Use the Original report as the primary reference.
- Use the English report only as a translation aid.
- Do not treat the English report as an additional independent list of required findings.

Return only valid JSON.
```

### User prompt template for LLM-as-judge evaluation

```
GROUND TRUTH:
{gt}

MODEL ANSWER:
{pred}

Score independently.

Correctness:
2 = main ECG interpretation is clinically correct or nearly correct.
1 = partially correct: some main findings are correct, but there is an important wrong or missing
↳ conclusion.
0 = mostly incorrect, or the main diagnosis conclusion is wrong.

Completeness:
2 = all or nearly all important GT diagnoses are present.
1 = at least one important GT diagnosis is present, but relevant GT findings are missing.
0 = no clinically meaningful GT diagnosis is present.

Specificity:
2 = nearly all model diagnoses are supported by or compatible with GT.
1 = mixed answer: some supported diagnoses plus unsupported or wrong extras.
0 = mostly unsupported or dominated by wrong diagnoses.

Return JSON exactly:
{{
  "correctness": int,
  "completeness": int,
  "specificity": int,
  "total_score": int,
  "notes": "reason"
}}
```

## References

- [1] Akshay Goel. Langextract v1.4.0, 2026. Version 1.4.0.
- [2] Google. Langextract. <https://github.com/google/langextract>, 2025. GitHub repository.

- [3] OpenAI. Introducing gpt-oss. <https://openai.com/index/introducing-gpt-oss/>, 2025.
- [4] OpenAI. gpt-oss-20b model card. <https://huggingface.co/openai/gpt-oss-20b>, 2025.
- [5] OpenAI. gpt-oss-120b and gpt-oss-20b model card, 2025.
